# Supplementary material for: Tetradecanuclear lanthanide-vanadium “nanochocolates”: catalytically-active cationic heteropolyoxovanadium clusters
Source: Royal Society of Chemistry journal article supplement (doi:10.1039/c3ra40385h), 2013-01-01
Supplement: c3ra40385h.pdf [file c3ra40385h.pdf]

## SUPPORTING INFORMATION

Title: Tetradecanuclear Lanthanide-Vanadium "Nanochocolates": Catalytically-Active Cationic Heteropolyoxovanadium Clusters

Author(s): Mária Šimuneková, Denis Prodius\*, Valeriu Mereacre, Peter Schwendt, Constantin Turta, Marco Bettinelli, Adolfo Speghini, Yanhua Lan, Christopher E. Anson, and Annie K. Powell\*

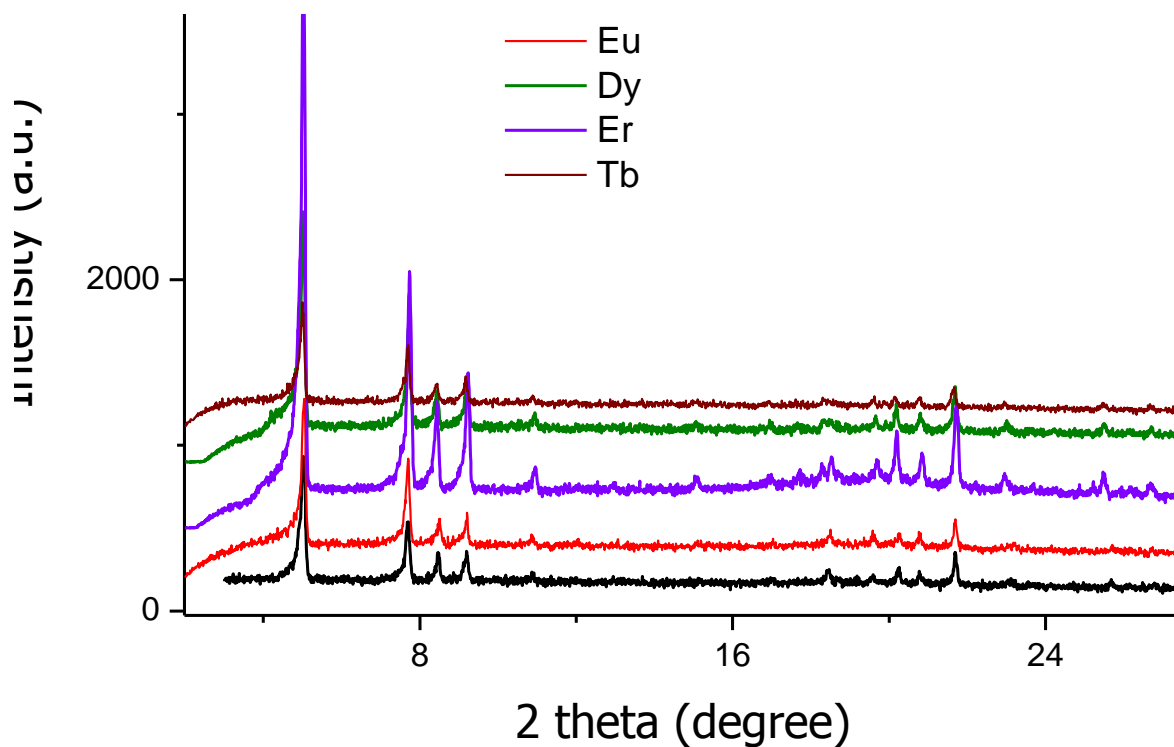

**Figure S1:** X-Ray powder diffraction patterns measured for compounds 1-5 (in capillary with mother liquor).

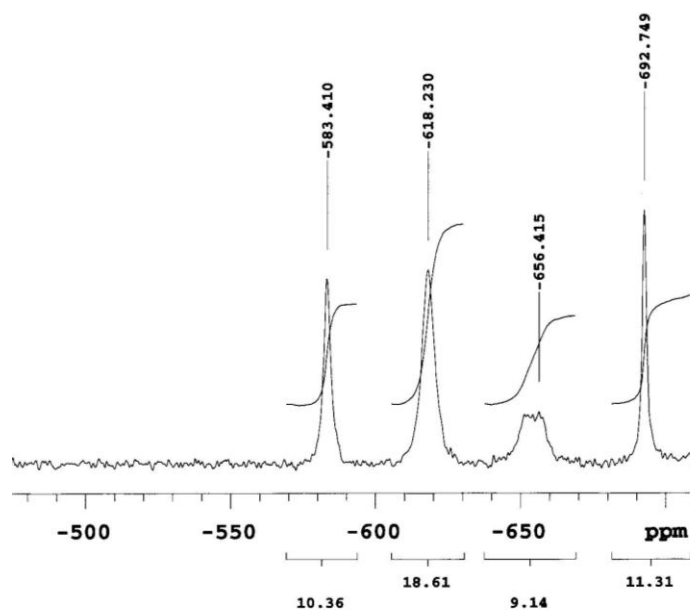

**Figure S2.** <sup>51</sup>V-NMR spectra of 1 (Eu) in acetonitrile-*d*<sup>3</sup> at -25°C (VOCl<sub>3</sub> as reference sample).

### Magnetic data:

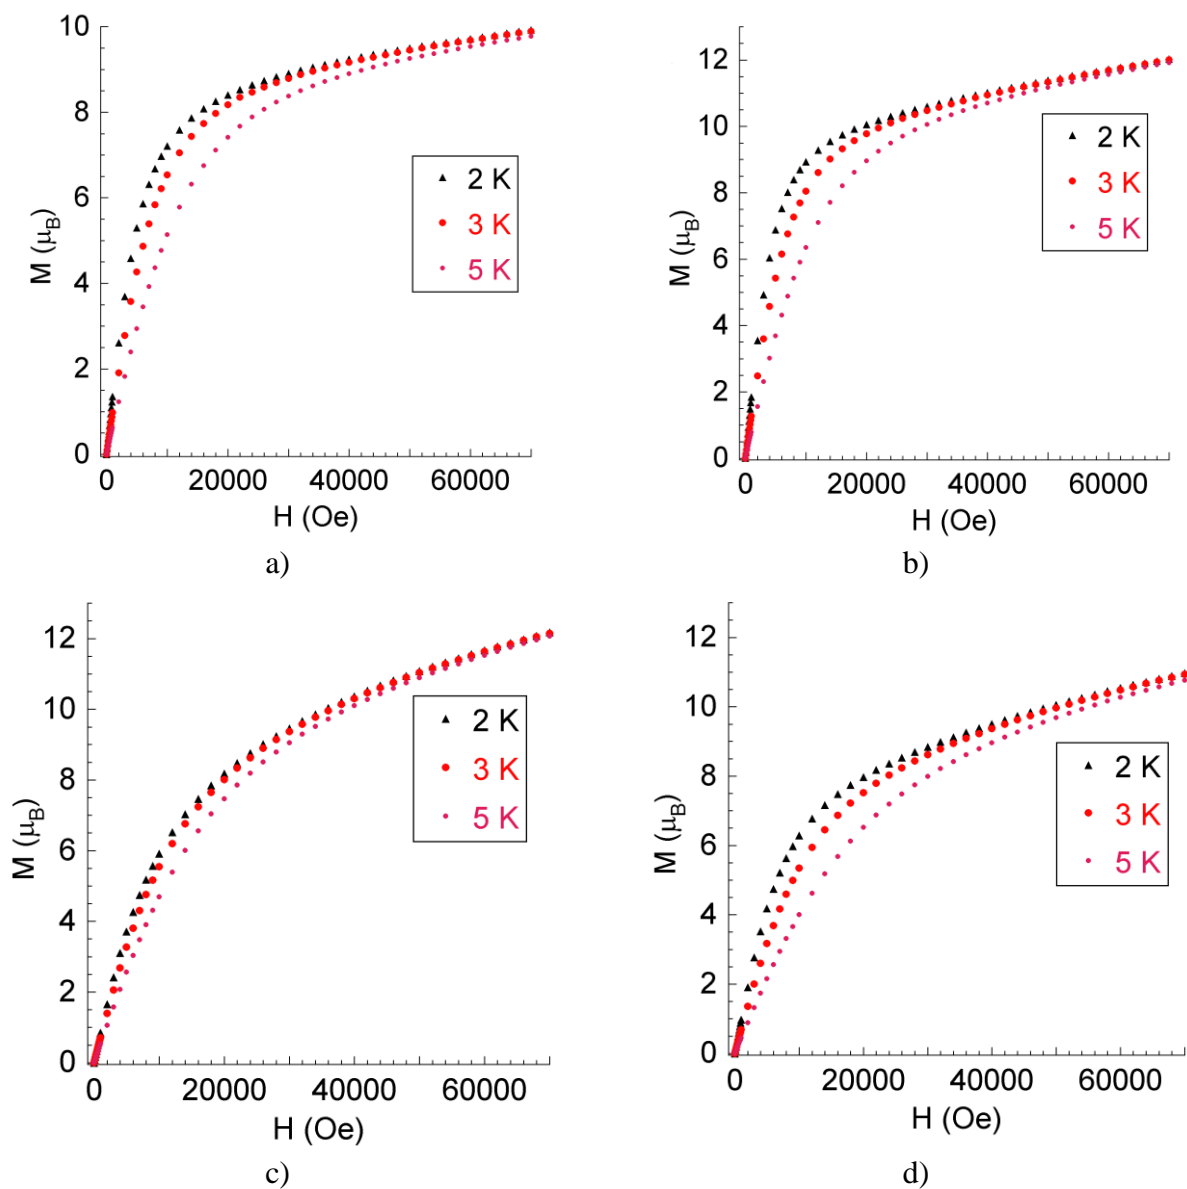

**Figure S3.** Variable-field magnetization data for complexes **2** (a), **3** (b), **4** (c), **5** (d) at indicated temperatures.

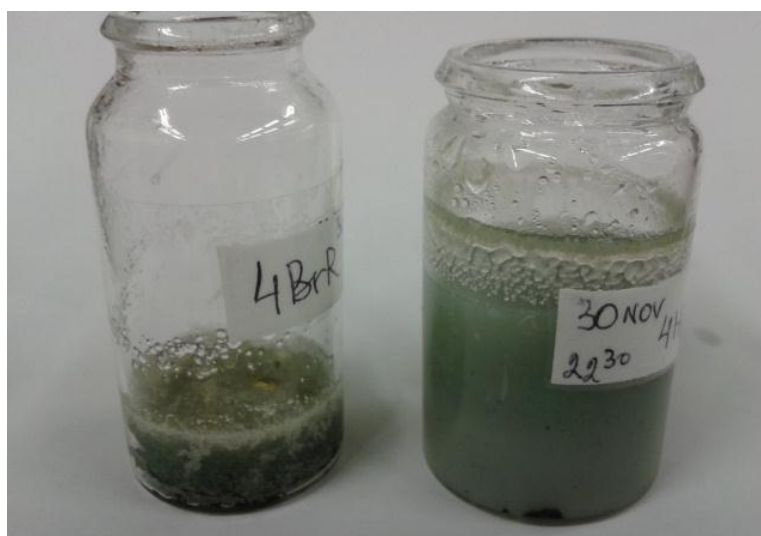

**Figure S4.** Dihydropyrimidinone synthesis: direct solidification of **7a** (right) and **7b** (left) after the reaction time (30 min).
